# Supplementary material
Source: PubMed Central journal article supplement (PMC3582133)
Supplement: JCI65344sd.pdf [file JCI65344sd.pdf]

## Supplemental Figure 1

### A.

|                   |                                    |                   |                                    |
|-------------------|------------------------------------|-------------------|------------------------------------|
| <b>Let-7a</b>     | <b>UUGAUUGUUG-GAUGAUGGAGU</b>      | <b>Let-7b</b>     | <b>UUGGUGUGUUG-GAUGAUGGAGU</b>     |
| <b>Ago1 3'UTR</b> | <b>GAAGGCAGAACGCTGTTACCTCA</b>     | <b>Ago1 3'UTR</b> | <b>GAAGGCAGAACGCTGTTACCTCA</b>     |
| <b>Let-7c</b>     | <b>UUGGUAUGUUG-GAUGAUGGAGU</b>     | <b>Let-7d</b>     | <b>UUGAUACG--UUG-GAUGAUGGAGA</b>   |
| <b>Ago1 3'UTR</b> | <b>GAAGGCAGAACGCTGTTACCTCA</b>     | <b>Ago1 3'UTR</b> | <b>TTGAAGGCAGAACGCTGTTACCTCA</b>   |
| <b>Let-7e</b>     | <b>UUGAUUGUUGGAGGAUGGAGU</b>       | <b>Let-7f</b>     | <b>UUGAUUGUU-AGAUGAUGGAGU</b>      |
| <b>Ago1 3'UTR</b> | <b>TCCT-TAT-TCCTCCTACCTCC</b>      | <b>Ago1 3'UTR</b> | <b>GAAGGCAGAACGCTGTTACCTCA</b>     |
| <b>Let-7g</b>     | <b>UUGACAUGUU-UGAUGAUGGAGU</b>     | <b>Let-7i</b>     | <b>UUGUCGUGUU-UGAUGAUGGAGU</b>     |
| <b>Ago1 3'UTR</b> | <b>GAAGGCAGAACGCTGTTACCTCA</b>     | <b>Ago1 3'UTR</b> | <b>GAAGGCAGAACGCTGTTACCTCA</b>     |
| <b>miR-103</b>    | <b>AGUAUCGGGACAU----GUUACGACGA</b> | <b>miR-107</b>    | <b>ACUAUCGGGACAU----GUUACGACGA</b> |
| <b>Ago1 3'UTR</b> | <b>TGCCTTCCCTGTAACGGTAATGCTGCA</b> | <b>Ago1 3'UTR</b> | <b>TGCCTTCCCTGTAACGGTAATGCTGCA</b> |

### B. Let-7 target site

```

Hsa  AGGCAGAACGCTGTTACCTCACTGGATAGAAGAAAAGCTTTCCAAGCCCCAGGAGCTGTGCCACCCAAATCCAGAGGAAGCAAGGAGGAGGGAGG---TGGGGTAGGGAG--GAGTGTAGG 115
Ptr  AGGCAGAACGCTGTTACCTCACTGGATAGAAGAAAAGCTTTCCAAGCCCCAGGAGCTGTGCCACCCAAATCCAGAGGAAGCAAGGAGGAGGGAGG---TGGGGTAGGGAG--GAGTGTAGG
Mml  AGGCAGAACGCTGTTACCTCACTGGATAGAAGAAAAGCTTTCCAAGCCCCAGGAGCTGTGCCACCCAAATCCAGAGGAAGCAAGGAGGAGGGAGG---TGGGGTAGGGAG--GAGTGTAGG
Cpo  AGGCAGAACGCTGTTACCTCACTGGATAGAAGAAAAGCTTTCCAAGCCCCAGGAGCTGTGCCACCCAAATCCAGAGGAAGCAAGGAGGAGGGAGG---TGGGGTAGGGAG--GAGTGTAGG
Sar  AGGCAGAACGCTGTTACCTCACTGGATAGAAGAAAAGCTTTCCAAGCCCCAGGAGCTGTGCCACCCAAATCCAGAGGAAGCAAGGAGGAGGGAGGAGGTGGGGTTAAGGG--GAGTGTAGG
Eeu  AGGCAGAACGCTGTTACCTCACTGGATAGAAGAAAAGCTTTCCAAGCCCCAGGAGCTGTGCCACCCAAATCCAGAGGAAGCAAGGAGGAGGGAGG---TGGGGTAGGGAG--GAGTGTAGG
Cfa  AGGCAGAACGCTGTTACCTCACTGGATAGAAGAAAAGCTTTCCAAGCCCCAGGAGCTGTGCCACCCAAATCCAGAGGAAGCAAGGAGGAGGGAGG---AGGGTAGGGAG--GAGTGTAGG
Fca  AGGCAGAACGCTGTTACCTCACTGGATAGAAGAAAAGCTTTCCAAGCCCCAGGAGCTGTGCCACCCAAATCCAGAGGAAGCAAGGAGGAGGGAGG---AGGGTAGGGAG--GAGTGTAGG
Eca  AGGCAGAACGCTGTTACCTCACTGGATAGAAGAAAAGCTTTCCAAGCCCCAGGAGCTGTGCCACCCAAATCCAGAGGAAGCAAGGAGGAGGGAGG---GGAGT---GGGGTAGGGAG--GAGTGTAGG
Bta  AGGCAGAACGCTGTTACCTCACTGGATAGAAGAAAAGCTTTCCAAGCCCCAGGAGCTGTGCCACCCAAATCCAGAGGAAGCAAGGAGGAGGGAGG---TGGGGTAGGGAG--GAGTGTAGG
Dno  TGGCAGAACGCTGTTACCTCACTGGATAGAAGAAAAGCTTTCCAAGCCCCAGGAGCTGTGCCACCCAAATCCAGAGGAAGCAAGGAGGAGGGAGG---GGTGGGGTAGGGAGGAAATGTAGG
Laf  AGGCAGAACGCTGTTACCTCACTGGATAGAAGAAAAGCTTTCCAAGCCCCAGGAGCTGTGCCACCCAAATCCAGAGGAAGCAAGGAGGAGGGAGG---TGGGGTAGGGAG--GAGTGTAGG
Ete  AGGCAGAACGCTGTTACCTCACTGGATAGAAGAAAAGCTTTCCAAGCCCCAGGAGCTGTGCCACCCAAATCCAGAGGAAGCAAGGAGGAGGGAGG---AGGGTAGGGAG--GAGTGTAGG
Mmu  AGGCAGAACGCTGTTACCTCACTGGATAGAAGAAAAGCTTTCCAAGCCCCAGGAGCTGTGCCACCCAAATCCAGAGGAAGCAAGGAGGAGGGAGG---TGGGGTAGGGAG--GAGTGTAGG
Rno  AGGCAGAACGCTGTTACCTCACTGGATAGAAGAAAAGCTTTCCAAGCCCCAGGAGCTGTGCCACCCAAATCCAGAGGAAGCAAGGAGGAGGGAGG---TGGGGTAGGGAG--GAGTGTAGG
*****

```

### C. miR-103/107 target site

```

Hsa  ACCAGTGCCTTCCCTGTAACGGTAATGCTGCGAAGTGAACCTTTTGTACCTTTCTTTGGG--GAATGGGGTGGGGTGGGAGAGGAGGTAGATGGGGAAG---AAATACCCAGAC 881
Ptr  ACCAGTGCCTTCCCTGTAACGGTAATGCTGCGAAGTGAACCTTTTGTACCTTTCTTTGGG--GAATGGGGTGGGGTGGGAGAGGAGGTAGATGGGGAAG---AAATACCCAGAC
Mml  ACCAGTGCCTTCCCTGTAACGGTAATGCTGCGAAGTGAACCTTTTGTACCTTTCTTTGGG--GAATGGGGTGGGGTGGGAGAGGAGGTAGATGGGGAAG---AAATACCCAGAC
Cpo  ACCAGTGCCTTCCCTGTAATGGTAATGCTGCGAAGTGAACCTTTTGTACCTTTCTTTGGG--AGTTGGGGTGGGAGTGGGAGAGGAGGTAGATGGGGAAG---AAATATCCCAAC
Sar  ATCAGTGCCTTCCCTGTAATGGTAATGCTGCGAAGTGAACCTTTTGTACCTTTCTTTGGG--GAGTGGGGTGGGG--GGGCTGGG-----AGAGG---AGTTAGATAGGA-
Eeu  ACCAGTGCCTTCCCTGTAATGGTAATGCTGCGAAGTGAACCTTTTGTACCTTTCTTTGGG--GGGTGGGGTGGGGTGGGAGAGGAGGTAGGTTGGGGAAG---AAATACCCCTAAC
Cfa  ACCAGTGCCTTCCCTGTAACGGTAATGCTGCGAAGTGAACCTTTTGTACCTTTCTTTGGG--GGGATAGGGTGGGGTGGGAGAGGAGGTAGGTTGGGGAAG---AAATACCCCTAAC
Fca  ACCAGTGCCTTCCCTGTAACGGTAATGCTGCGAAGTGAACCTTTTGTACCTTTCTTTGGG--GGGATAGGGTGGGGTGGGAGAGGAGGTAGGTTGGGGAAG---AAATACCCCTAAC
Eca  ACCAGTGCCTTCCCTGTAACGGTAATGCTGCGAAGTGAACCTTTTGTACCTTTCTTTGGG--GGGATAGGGTGGGGTGGGAGAGGAGGTAGGTTGGGGAAG---AAATATCCCTAAC
Bta  ACCAGTGCCTTCCCTGTAATGGTAATGCTGCGAAGTGAACCTTTTGTACCTTTTGGGGTGGGGTGGGAGAGGAGGTAGGTTGGGGAAG---AAATACCCCTAAC
Dno  ACCAGTGCCTTCCCTGTAACGGTAATGCTGCGAAGTGAACCTTTTGTACCTTTCTTTGGG--GGGATAGGGTGGGGTGGGAGAGGAGGTAGGTTGGGGAAG---AAATACCCCTAAC
Laf  ACCAGTGCCTTCCCTGTAATGGTAATGCTGCGAAGTGAACCTTTTGTACCTTTCTTTGGG--GGGATAGGGTGGGGTGGGAGAGGAGGTAGGTTGGGGAAG---AAATACCCCTAAC
Ete  ACCAGTGCCTTCCCTGTAACGGTAATGCTGCGAAGTGAACCTTTTGTACCTTTCTTTGGG--GGGACTGGGTGGGGTGGGAGAGGAGGTAGGTTGGGGAAG---AAATACCCCTAAC
Mmu  ACCAGTGCCTTCCC-GTAACGGTAATGCTGCGAAGTGAACCTTTTGTACCTTTCTCTGGG--GGGTGGGGTGGGGTGGGAGAGGAGGAGGAGGGAGGGCAGAAATAGCCCAATG
Rno  ACCAGTGCCTTCCC-GTAACGGTAATGCTGCGAAGTGAACCTTTTGTACCTTTCTCTGGG--GGATGGGGTGGGGTGGGAGAGGAGGTAGGAGGGAGGGACGAGCTATCCCAATG
*****

```

Supplemental Figure 2

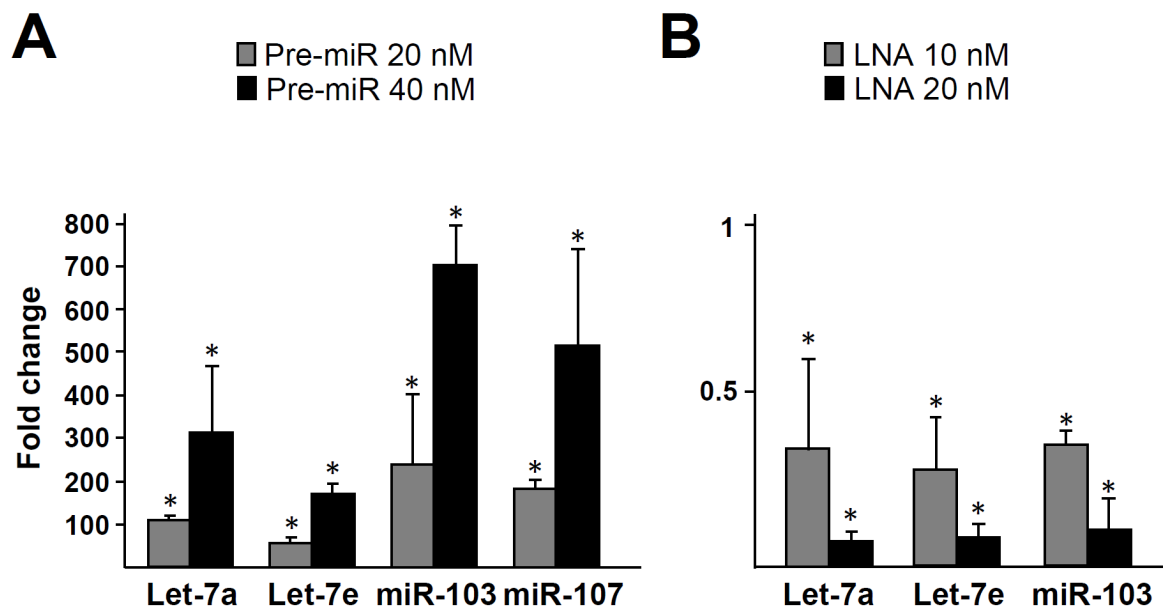

Supplemental Figure 3

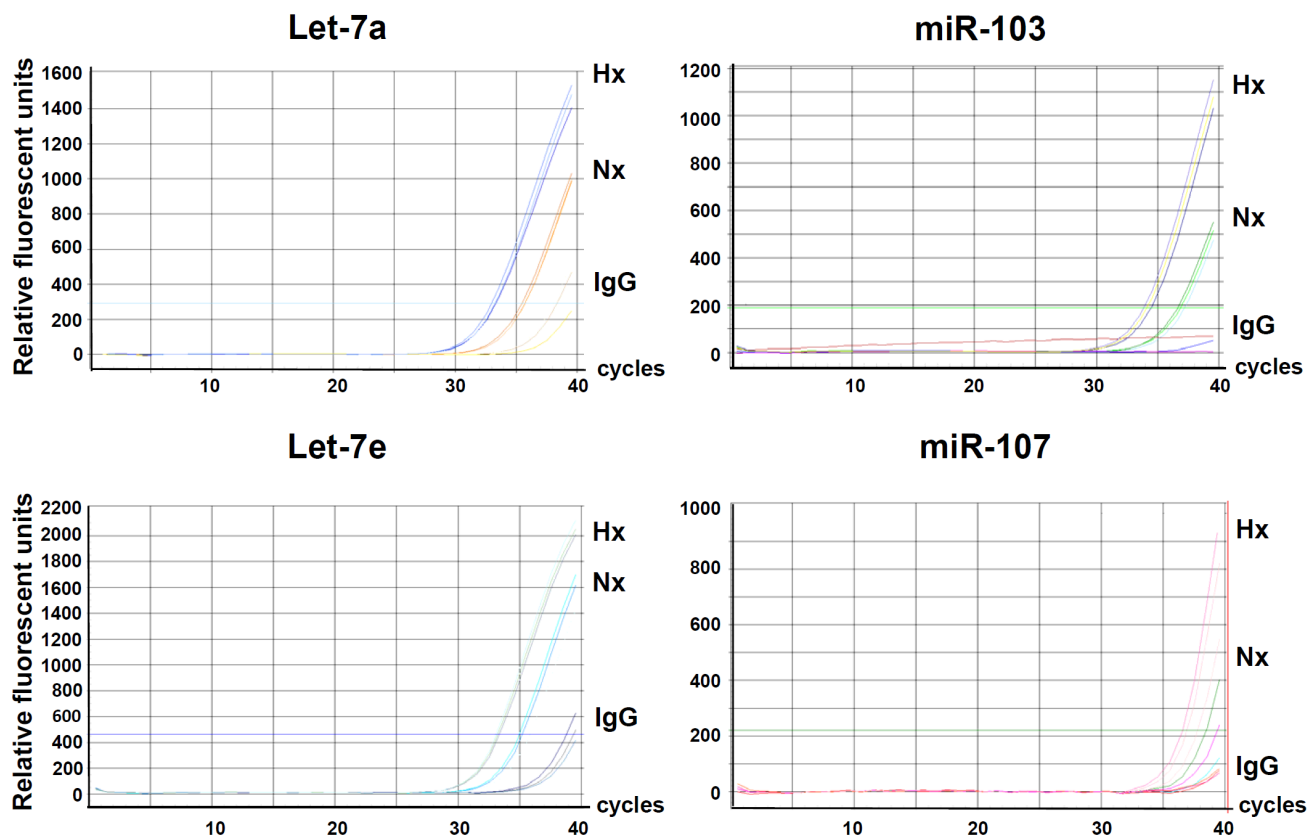

Supplemental Figure 4

**A**

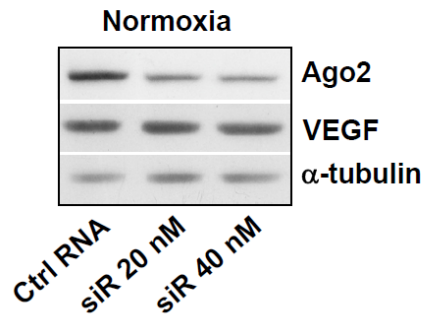

**B**

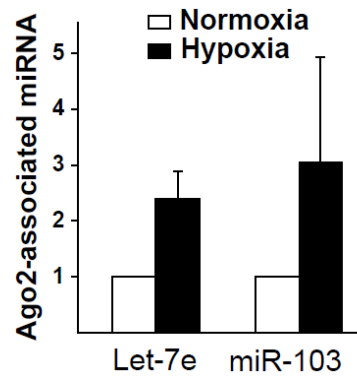

**C**

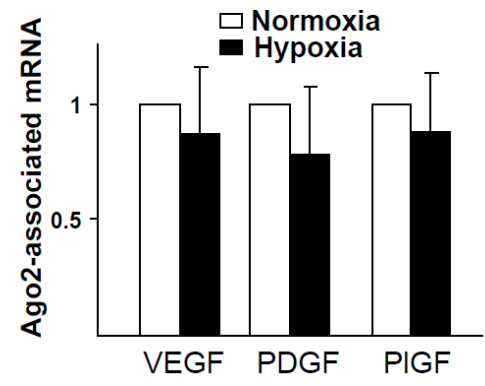

Supplemental Figure 5

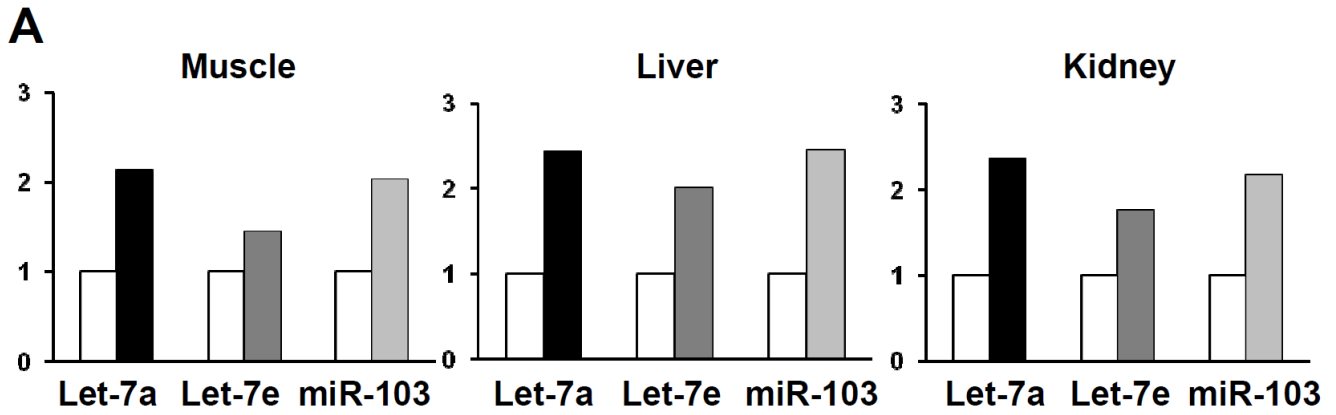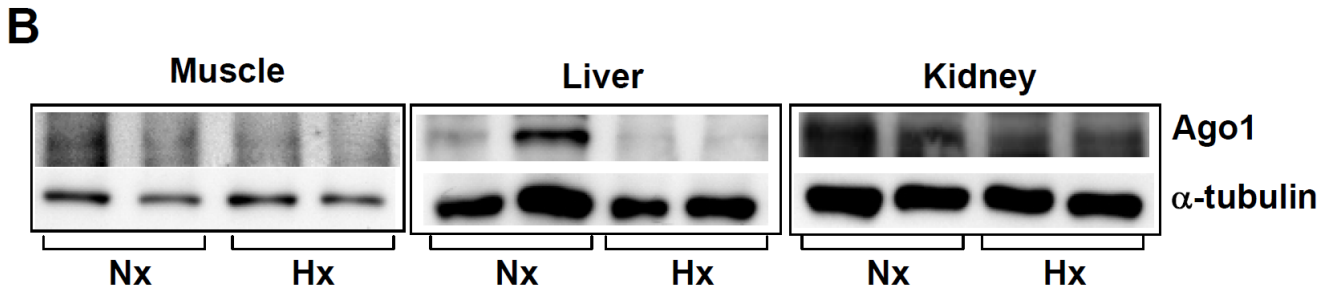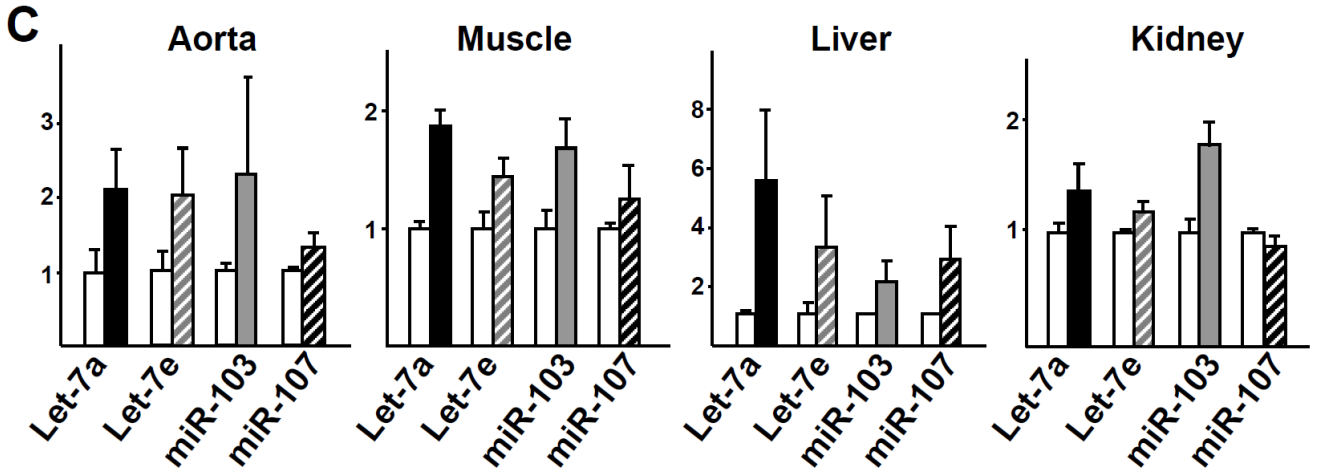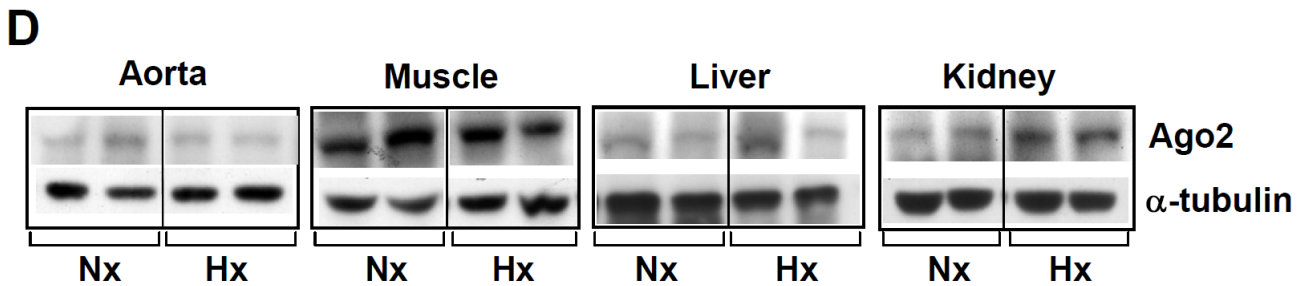

Supplemental Figure 6

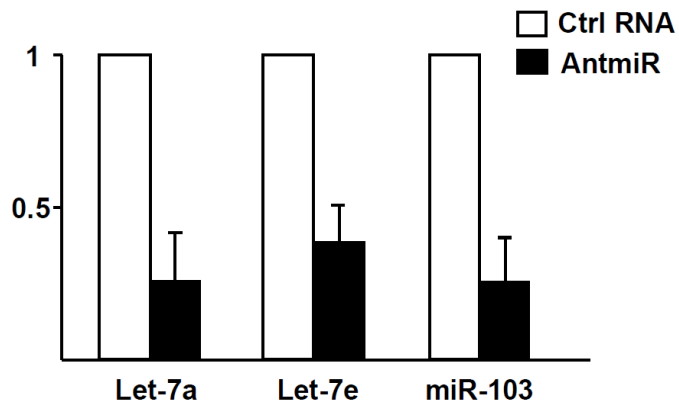

Supplemental Figure 7

**A**

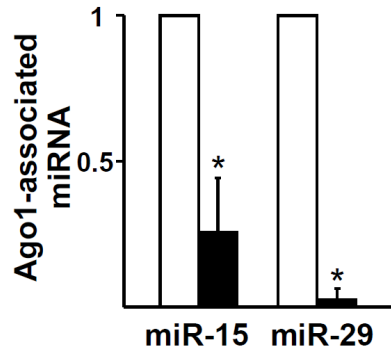

**B**

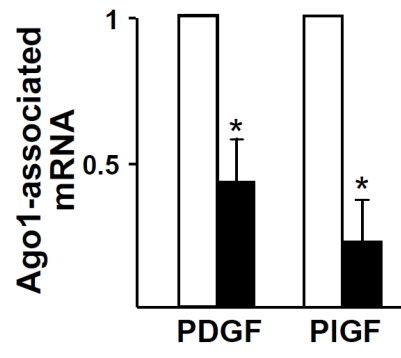

Supplemental Figure 8

**A**

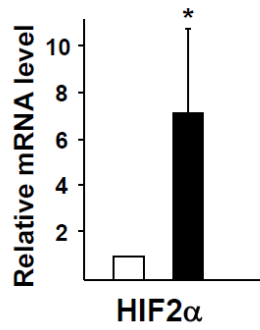

**B**

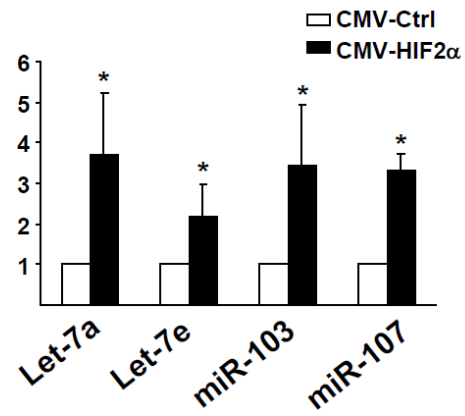

**C**

| miRNA     | TFBS      | Sequence   |
|-----------|-----------|------------|
| Let-7a-1  | -378 (-)  | gcgCACGTgt |
| Let-7a-2  | -3540 (-) | acgCACGTac |
| Let-7a-3  | -359 (-)  | cagCACGTgc |
| Let-7b    | -359 (-)  | cagCACGTgc |
| Let-7d    | -378 (-)  | gcgCACGTgt |
| Let-7f-1  | -378 (-)  | gcgCACGTgt |
| Let-7g    | -394 (+)  | agACGTGctc |
| Let-7i    | -1672 (+) | ccACGTGcaa |
| miR-103-1 | -1315 (-) | atgCACGTtt |
| miR-103-2 | -2190 (+) | caACGTGctg |



**Supplemental Table 1. Deep Sequencing of miRNA Profile in Normoxia and Hypoxia HUVECs**

| <b>miRNA</b>    | <b>Reads in Nx</b> | <b>Reads in Hx</b> | <b>Fold Change</b> |
|-----------------|--------------------|--------------------|--------------------|
| hsa-let-7a      | 277                | 2614               | 6.96               |
| hsa-let-7b      | 146                | 900                | 4.54               |
| hsa-let-7c      | 205                | 1089               | 3.92               |
| hsa-let-7d      | 252                | 1032               | 3.02               |
| hsa-let-7e      | 52                 | 655                | 9.29               |
| hsa-let-7f      | 984                | 5820               | 4.36               |
| hsa-let-7g      | 171                | 1476               | 6.36               |
| hsa-let-7i      | 142                | 488                | 2.53               |
| hsa-miR-101     | 307                | 199                | 0.48               |
| hsa-miR-103     | 334                | 3743               | 8.26               |
| hsa-miR-106b    | 22                 | 18                 | 0.60               |
| hsa-miR-107     | 336                | 3789               | 8.31               |
| hsa-miR-139-5p  | 9                  | 11                 | 0.90               |
| hsa-miR-146a    | 27                 | 70                 | 1.91               |
| hsa-miR-148b    | 12                 | 38                 | 2.33               |
| hsa-miR-151-3p  | 13                 | 90                 | 5.10               |
| hsa-miR-151-5p  | 7                  | 104                | 10.95              |
| hsa-miR-152     | 3                  | 19                 | 4.67               |
| hsa-miR-15a     | 14                 | 16                 | 0.84               |
| hsa-miR-15b     | 29                 | 28                 | 0.71               |
| hsa-miR-16      | 18                 | 174                | 7.13               |
| hsa-miR-17      | 17                 | 27                 | 1.17               |
| hsa-miR-185     | 6                  | 20                 | 2.46               |
| hsa-miR-186     | 1                  | 14                 | 10.32              |
| hsa-miR-191     | 11                 | 16                 | 1.07               |
| hsa-miR-192     | 55                 | 85                 | 1.14               |
| hsa-miR-193a-3p | 11                 | 37                 | 2.48               |
| hsa-miR-196b    | 10                 | 23                 | 1.70               |
| hsa-miR-199a-3p | 68                 | 220                | 2.39               |
| hsa-miR-199b-3p | 68                 | 220                | 2.39               |
| hsa-miR-19b     | 22                 | 21                 | 0.70               |
| hsa-miR-20a     | 25                 | 11                 | 0.32               |
| hsa-miR-21      | 2828               | 1508               | 0.39               |
| hsa-miR-216a    | 16                 | 18                 | 0.83               |
| hsa-miR-217     | 50                 | 113                | 1.67               |
| hsa-miR-22      | 85                 | 202                | 1.75               |
| hsa-miR-221     | 737                | 2881               | 2.88               |
| hsa-miR-222     | 386                | 593                | 1.13               |

| <b>miRNA</b>   | <b>Reads in Nx</b> | <b>Reads in Hx</b> | <b>Fold Change</b> |
|----------------|--------------------|--------------------|--------------------|
| hsa-miR-23a    | 489                | 149                | 0.22               |
| hsa-miR-23b    | 19                 | 6                  | 0.23               |
| hsa-miR-24     | 54                 | 96                 | 1.31               |
| hsa-miR-26a    | 24                 |                    |                    |
| hsa-miR-27a    | 1197               | 1698               | 1.05               |
| hsa-miR-27b    | 118                | 129                | 0.81               |
| hsa-miR-28-3p  | 5                  | 43                 | 6.34               |
| hsa-miR-28-5p  | 7                  | 10                 | 1.05               |
| hsa-miR-299-3p | 30                 | 12                 | 0.29               |
| hsa-miR-30c    | 42                 | 9                  | 0.16               |
| hsa-miR-31     | 6                  | 62                 | 7.62               |
| hsa-miR-320    | 11                 | 101                | 6.77               |
| hsa-miR-323-3p | 10                 | 8                  | 0.59               |
| hsa-miR-340    | 76                 | 50                 | 0.49               |
| hsa-miR-34a    | 15                 | 29                 | 1.43               |
| hsa-miR-369-3p | 4                  | 12                 | 2.21               |
| hsa-miR-376c   | 9                  | 21                 | 1.72               |
| hsa-miR-378    | 119                | 304                | 1.88               |
| hsa-miR-379    | 256                | 221                | 0.64               |
| hsa-miR-381    | 12                 | 1                  | 0.06               |
| hsa-miR-382    | 1                  | 18                 | 13.27              |
| hsa-miR-410    | 6                  | 10                 | 1.23               |
| hsa-miR-411    | 88                 | 40                 | 0.34               |
| hsa-miR-423-3p | 12                 | 17                 | 1.04               |
| hsa-miR-423-5p | 19                 | 42                 | 1.63               |
| hsa-miR-432    | 4                  | 13                 | 2.40               |
| hsa-miR-455-3p | 6                  | 24                 | 2.95               |
| hsa-miR-495    | 7                  | 16                 | 1.69               |
| hsa-miR-497    | 16                 | 22                 | 1.01               |
| hsa-miR-503    | 10                 | 24                 | 1.77               |
| hsa-miR-532-5p | 7                  | 51                 | 5.37               |
| hsa-miR-574-3p | 38                 | 52                 | 1.01               |
| hsa-miR-584    | 53                 | 56                 | 0.78               |
| hsa-miR-652    | 7                  | 25                 | 2.63               |
| hsa-miR-877    | 1                  | 12                 | 8.85               |
| hsa-miR-886-3p | 8                  | 25                 | 2.30               |
| hsa-miR-886-5p | 11                 | 114                | 7.64               |
| hsa-miR-92b    | 8                  | 12                 | 1.11               |
| hsa-miR-98     | 17                 | 56                 | 2.43               |

**Supplemental Table 2. Putative HIF1 $\alpha$  binding sites in the HRM promoter regions.**

| <b>miRNA</b> | <b>Chromosome</b> | <b>Human sequence</b> | <b>Mouse sequence</b> | <b>Conservation Score</b> |
|--------------|-------------------|-----------------------|-----------------------|---------------------------|
| Let-7a-1     | 9                 | GTCACGTGGCCG          | GTCACGTGGCCT          | 0.315                     |
| Let-7d       |                   |                       |                       |                           |
| Let-7f-1     | 11                | AAAACGTGGCAC          | ATGGTGTAGCAT          | 0.079                     |
| Let-7a-2     |                   |                       |                       |                           |
| Let-7b       | 22                | GGAACGTGGTCT          | CAA---TGCTCT          | 0.574                     |
| Let-7a-3     |                   |                       |                       |                           |
| Let-7c       | 21                | CAAACGTGTGTA          | CGAACGTGTGCA          | 0.996                     |
| Let-7g       | 3                 | AGGACGTGGCTG          | AGGACGTGGCTG          | 0.147                     |
| miR-103-1    | 5                 | GTCACGTGGGCG          | GTCACGTGGGCG          | 0.793                     |
| miR-103-2    | 20                | ACTACGTGAGTG          | GTTTCCTAAGTA          | 0.049                     |
| miR-107      | 10                | GTAACGTGAATG          | -TAGCATGGGTG          | 0.915                     |

Supplemental Table 3. Summary of Putative HRM Targets

A.

| miRNA                 | Let-7s | miR-103/107 |
|-----------------------|--------|-------------|
| Total targets         | 169    | 148         |
| Intracellular targets | 95     | 80          |
| Extracellular targets | 74     | 42          |

B.

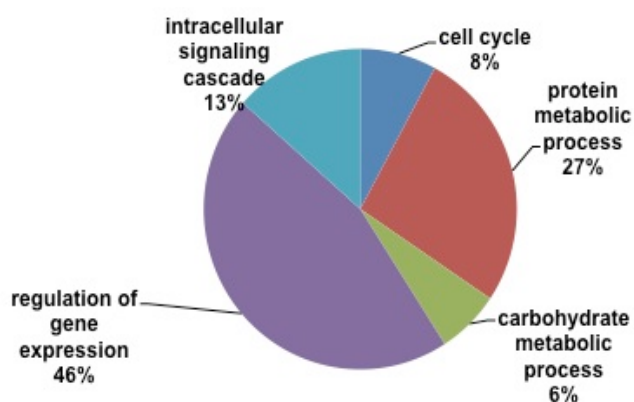

C.

|             |                                                                                                                                                                                                                                       |
|-------------|---------------------------------------------------------------------------------------------------------------------------------------------------------------------------------------------------------------------------------------|
| Let-7s      | <i>EIF2C1</i> (Eukaryotic translation initiation factor 2C 1) (Argonaute-1)<br><i>HOXA1</i> (Homeobox protein A1) (Hox-1F)<br><i>DAPK1</i> (Death-associated protein kinase 1) (DAP kinase 1)<br><i>ACSS2</i> (Acetyl-CoA synthetase) |
| miR-103/107 | <i>EIF2C1</i> (Eukaryotic translation initiation factor 2C 1) (Argonaute-1)<br><i>TAF5</i> (transcription initiation factor TFIID subunit 5).<br><i>AATF</i> (Apoptosis-antagonizing transcription factor)                            |

**Supplemental Table 4. Correlation among HRM, Ago1, VEGF, and CD31 expression in HCC tissue array.**

| <b>Correlation</b> | <b>Sample size</b> | <b>Spearman's rho</b> | <b><i>p</i> value</b> |
|--------------------|--------------------|-----------------------|-----------------------|
| Let-7e vs Ago1     | 176                | -0.243                | 0.001                 |
| miR-103 vs Ago1    | 176                | -0.247                | 0.001                 |
| Ago1 vs VEGF       | 173                | -0.187                | 0.014                 |
| Ago1 vs CD31       | 163                | -0.127                | 0.106                 |

**Supplemental Table 5. Genes involved in glycolysis that are decreased in Ago1-miRISC under hypoxia.**

| <b>Gene Symbol</b> | <b>Gene Name</b>                                       | <b>Expression Difference</b> |
|--------------------|--------------------------------------------------------|------------------------------|
| LDHB               | lactate dehydrogenase B                                | -5.103                       |
| GPI                | glucose-6-phosphate isomerase                          | -4.735                       |
| LDHA               | lactate dehydrogenase A                                | -4.627                       |
| HK2                | hexokinase 2                                           | -4.420                       |
| OGDH               | oxoglutarate (alpha-ketoglutarate) dehydrogenase       | -4.354                       |
| PGK1               | phosphoglycerate kinase 1                              | -4.263                       |
| LDHAL6B            | lactate dehydrogenase A-like 6B                        | -4.210                       |
| NCOR1              | nuclear receptor corepressor 1                         | -4.209                       |
| PGAM1              | phosphoglycerate mutase 1 (brain)                      | -4.185                       |
| PGK2               | phosphoglycerate kinase 2                              | -4.167                       |
| ADPGK              | ADP-dependent glucokinase                              | -4.110                       |
| PGAM4              | phosphoglycerate mutase family member 4                | -4.053                       |
| DLAT               | dihydrolipoamide S-acetyltransferase                   | -4.044                       |
| ECD                | ecdysoneless homolog (Drosophila)                      | -3.891                       |
| ARNT               | aryl hydrocarbon receptor nuclear translocator         | -3.807                       |
| GAPDH              | glyceraldehyde-3-phosphate dehydrogenase               | -3.784                       |
| HK3                | hexokinase 3 (white cell)                              | -3.637                       |
| PGAM2              | phosphoglycerate mutase 2 (muscle)                     | -3.635                       |
| ENTPD5             | ectonucleoside triphosphate diphosphohydrolase 5       | -3.620                       |
| TPI1               | triosephosphate isomerase 1                            | -3.617                       |
| DHTKD1             | dehydrogenase E1 and transketolase domain containing 1 | -3.591                       |
| INSR               | insulin receptor                                       | -3.468                       |
| MLXIPL             | MLX interacting protein-like                           | -3.456                       |
| PDHA1              | pyruvate dehydrogenase (lipoamide) alpha 1             | -3.448                       |
| HDAC4              | histone deacetylase 4                                  | -3.442                       |
| HK1                | hexokinase 1                                           | -3.350                       |
| OGDHL              | oxoglutarate dehydrogenase-like                        | -3.275                       |
| PDHB               | pyruvate dehydrogenase (lipoamide) beta                | -3.182                       |
| PPARA              | peroxisome proliferator-activated receptor alpha       | -3.158                       |
| LDHC               | lactate dehydrogenase C                                | -2.759                       |
| ENO4               | enolase family member 4                                | -2.706                       |

**Supplemental Table 6. Genes involved in angiogenesis that are decreased in Ago1-miRISC under hypoxia.**

| <b>Gene Symbol</b> | <b>Gene Name</b>                                                                                         | <b>Expression Difference</b> |
|--------------------|----------------------------------------------------------------------------------------------------------|------------------------------|
| VEGFA              | vascular endothelial growth factor A                                                                     | -4.793                       |
| VEGFB              | vascular endothelial growth factor B                                                                     | -3.499                       |
| VEGFC              | vascular endothelial growth factor C                                                                     | -4.201                       |
| FIGF               | c-fos induced growth factor (vascular endothelial growth factor D)                                       | -3.371                       |
| PDGFA              | platelet-derived growth factor alpha polypeptide                                                         | -4.311                       |
| PDGFB              | platelet-derived growth factor beta polypeptide                                                          | -4.648                       |
| PDGFC              | platelet derived growth factor C                                                                         | -3.207                       |
| PDGFD              | platelet derived growth factor D                                                                         | -2.861                       |
| PIGF               | placental growth factor                                                                                  | -4.750                       |
| FLT1               | fms-related tyrosine kinase 1 (vascular endothelial growth factor/vascular permeability factor receptor) | -4.527                       |
| KDR                | kinase insert domain receptor (a type III receptor tyrosine kinase)                                      | -5.028                       |
| FLT3               | fms-related tyrosine kinase 3                                                                            | -2.667                       |
| ANGPT1             | angiopoietin 1                                                                                           | -2.771                       |
| ANGPT2             | angiopoietin 2                                                                                           | -4.373                       |
| TIE1               | tyrosine kinase with immunoglobulin-like and EGF-like domains 1                                          | -4.995                       |
| NCL                | nucleolin                                                                                                | -4.985                       |
| FOXS1              | forkhead box S1                                                                                          | -4.933                       |
| ADAM15             | ADAM metallopeptidase domain 15                                                                          | -4.931                       |
| HSPG2              | heparan sulfate proteoglycan 2                                                                           | -4.928                       |
| VEZF1              | vascular endothelial zinc finger 1                                                                       | -4.916                       |
| EPHB4              | EPH receptor B4                                                                                          | -4.742                       |
| GPI                | glucose-6-phosphate isomerase                                                                            | -4.735                       |
| GPX1               | glutathione peroxidase 1                                                                                 | -4.731                       |
| STAB1              | stabilin 1                                                                                               | -4.691                       |
| VASH1              | vasohibin 1                                                                                              | -4.657                       |
| HDAC7              | histone deacetylase 7                                                                                    | -4.566                       |
| NOTCH4             | notch 4                                                                                                  | -4.565                       |
| EDN1               | endothelin 1                                                                                             | -4.513                       |
| JAG1               | jagged 1                                                                                                 | -4.510                       |
| SRF                | serum response factor (c-fos serum response element-binding transcription factor)                        | -4.458                       |

| <b>Gene Symbol</b> | <b>Gene Name</b>                                                       | <b>Expression Difference</b> |
|--------------------|------------------------------------------------------------------------|------------------------------|
| EPHA2              | EPH receptor A2                                                        | -4.434                       |
| NRP1               | neuropilin 1                                                           | -4.434                       |
| RBM15              | RNA binding motif protein 15                                           | -4.432                       |
| ENG                | endoglin                                                               | -4.411                       |
| HOXA5              | homeobox A5                                                            | -4.399                       |
| S1PR1              | sphingosine-1-phosphate receptor 1                                     | -4.395                       |
| UTS2R              | urotensin 2 receptor                                                   | -4.391                       |
| HAND1              | heart and neural crest derivatives expressed 1                         | -4.388                       |
| RUNX1              | runt-related transcription factor 1                                    | -4.374                       |
| PLXND1             | plexin D1                                                              | -4.323                       |
| EPAS1              | endothelial PAS domain protein 1                                       | -4.285                       |
| MMP14              | matrix metalloproteinase 14 (membrane-inserted)                        | -4.283                       |
| HMOX1              | heme oxygenase (decycling) 1                                           | -4.281                       |
| ACVRL1             | activin A receptor type II-like 1                                      | -4.259                       |
| GATA6              | GATA binding protein 6                                                 | -4.255                       |
| ANPEP              | alanyl (membrane) aminopeptidase                                       | -4.202                       |
| MTDH               | metadherin                                                             | -4.199                       |
| HDAC3              | histone deacetylase 3                                                  | -4.192                       |
| VAV2               | vav 2 guanine nucleotide exchange factor                               | -4.186                       |
| ANXA2              | annexin A2                                                             | -4.152                       |
| FOXO4              | forkhead box O4                                                        | -4.150                       |
| NOTCH1             | notch 1                                                                | -4.147                       |
| SFRP1              | secreted frizzled-related protein 1                                    | -4.133                       |
| FGFR1              | fibroblast growth factor receptor 1                                    | -4.116                       |
| ARHGAP24           | Rho GTPase activating protein 24                                       | -4.109                       |
| ANXA2P2            | annexin A2 pseudogene 2                                                | -4.096                       |
| MFGE8              | milk fat globule-EGF factor 8 protein                                  | -4.083                       |
| SHB                | Src homology 2 domain containing adaptor protein B                     | -4.043                       |
| HAND2              | heart and neural crest derivatives expressed 2                         | -4.042                       |
| AMOT               | angiomin                                                               | -4.034                       |
| PML                | promyelocytic leukemia                                                 | -4.029                       |
| HOXA7              | homeobox A7                                                            | -3.994                       |
| RBPJ               | recombination signal binding protein for immunoglobulin kappa J region | -3.984                       |
| MAP3K7             | mitogen-activated protein kinase kinase kinase 7                       | -3.938                       |
| CX3CL1             | chemokine (C-X3-C motif) ligand 1                                      | -3.932                       |
| CCL24              | chemokine (C-C motif) ligand 24                                        | -3.931                       |



| <b>Gene Symbol</b> | <b>Gene Name</b>                                                                      | <b>Expression Difference</b> |
|--------------------|---------------------------------------------------------------------------------------|------------------------------|
| PROK1              | prokineticin 1                                                                        | -3.907                       |
| FZD6               | frizzled family receptor 6                                                            | -3.905                       |
| ARHGAP22           | Rho GTPase activating protein 22                                                      | -3.904                       |
| HDAC5              | histone deacetylase 5                                                                 | -3.869                       |
| MAPK7              | mitogen-activated protein kinase 7                                                    | -3.855                       |
| WARS               | tryptophanyl-tRNA synthetase                                                          | -3.835                       |
| APOLD1             | apolipoprotein L domain containing 1                                                  | -3.819                       |
| TBX4               | T-box 4                                                                               | -3.819                       |
| NF1                | neurofibromin 1                                                                       | -3.810                       |
| SLIT2              | slit homolog 2 (Drosophila)                                                           | -3.808                       |
| HDAC9              | histone deacetylase 9                                                                 | -3.806                       |
| FZD5               | frizzled family receptor 5                                                            | -3.790                       |
| NOS3               | nitric oxide synthase 3 (endothelial cell)                                            | -3.782                       |
| EREG               | epiregulin                                                                            | -3.750                       |
| SPHK1              | sphingosine kinase 1                                                                  | -3.739                       |
| CXCL17             | chemokine (C-X-C motif) ligand 17                                                     | -3.737                       |
| ZC3H12A            | zinc finger CCCH-type containing 12A                                                  | -3.712                       |
| CTGF               | connective tissue growth factor                                                       | -3.708                       |
| KLF5               | Kruppel-like factor 5 (intestinal)                                                    | -3.708                       |
| FGF18              | fibroblast growth factor 18                                                           | -3.689                       |
| ADAM8              | ADAM metallopeptidase domain 8                                                        | -3.668                       |
| C3                 | complement component 3                                                                | -3.666                       |
| FGF10              | fibroblast growth factor 10                                                           | -3.626                       |
| GATA4              | GATA binding protein 4                                                                | -3.616                       |
| GHRL               | ghrelin/obestatin prepropeptide                                                       | -3.613                       |
| BMP4               | bone morphogenetic protein 4                                                          | -3.601                       |
| MMP19              | matrix metallopeptidase 19                                                            | -3.592                       |
| ATPIF1             | ATPase inhibitory factor 1                                                            | -3.586                       |
| NUS1               | nuclear undecaprenyl pyrophosphate synthase 1 homolog (S. cerevisiae)                 | -3.584                       |
| SOX17              | SRY (sex determining region Y)-box 17                                                 | -3.567                       |
| IL17F              | interleukin 17F                                                                       | -3.566                       |
| PTGS2              | prostaglandin-endoperoxide synthase 2 (prostaglandin G/H synthase and cyclooxygenase) | -3.565                       |
| GREM1              | gremlin 1                                                                             | -3.554                       |
| SH2D2A             | SH2 domain containing 2A                                                              | -3.540                       |
| DLL4               | delta-like 4 (Drosophila)                                                             | -3.535                       |
| ANGPTL4            | angiopoietin-like 4                                                                   | -3.534                       |

| <b>Gene Symbol</b> | <b>Gene Name</b>                                                                         | <b>Expression Difference</b> |
|--------------------|------------------------------------------------------------------------------------------|------------------------------|
| PTEN               | phosphatase and tensin homolog                                                           | -3.509                       |
| ADORA2B            | adenosine A2b receptor                                                                   | -3.502                       |
| PLXDC1             | plexin domain containing 1                                                               | -3.494                       |
| C5AR1              | complement component 5a receptor 1                                                       | -3.488                       |
| HOXB3              | homeobox B3                                                                              | -3.455                       |
| ANXA3              | annexin A3                                                                               | -3.453                       |
| ECM1               | extracellular matrix protein 1                                                           | -3.450                       |
| AIMP1              | aminoacyl tRNA synthetase complex-interacting multifunctional protein 1                  | -3.434                       |
| AQP1               | aquaporin 1 (Colton blood group)                                                         | -3.430                       |
| FGF2               | fibroblast growth factor 2 (basic)                                                       | -3.426                       |
| NPR1               | natriuretic peptide receptor A/guanylate cyclase A (atrionatriuretic peptide receptor A) | -3.425                       |
| FGFR2              | fibroblast growth factor receptor 2                                                      | -3.420                       |
| CCL11              | chemokine (C-C motif) ligand 11                                                          | -3.414                       |
| TBXA2R             | thromboxane A2 receptor                                                                  | -3.407                       |
| EFNA1              | ephrin-A1                                                                                | -3.393                       |
| IHH                | Indian hedgehog                                                                          | -3.338                       |
| AGGF1              | angiogenic factor with G patch and FHA domains 1                                         | -3.334                       |
| ERAP1              | endoplasmic reticulum aminopeptidase 1                                                   | -3.312                       |
| FN1                | fibronectin 1                                                                            | -3.304                       |
| ANGPT4             | angiopoietin 4                                                                           | -3.298                       |
| CCBE1              | collagen and calcium binding EGF domains 1                                               | -3.290                       |
| HOXA3              | homeobox A3                                                                              | -3.290                       |
| CSPG4              | chondroitin sulfate proteoglycan 4                                                       | -3.286                       |
| KLK3               | kallikrein-related peptidase 3                                                           | -3.273                       |
| HS6ST1             | heparan sulfate 6-O-sulfotransferase 1                                                   | -3.238                       |
| C3AR1              | complement component 3a receptor 1                                                       | -3.230                       |
| VASH2              | vasohibin 2                                                                              | -3.202                       |
| LIF                | leukemia inhibitory factor (cholinergic differentiation factor)                          | -3.181                       |
| TSPAN12            | tetraspanin 12                                                                           | -3.156                       |
| PROK2              | prokineticin 2                                                                           | -3.112                       |
| PTK2B              | PTK2B protein tyrosine kinase 2 beta                                                     | -3.107                       |
| OVOL2              | ovo-like 2 (Drosophila)                                                                  | -3.103                       |
| ANGPTL6            | angiopoietin-like 6                                                                      | -3.093                       |
| THBS4              | Thrombospondin 4                                                                         | -3.090                       |
| FGF6               | fibroblast growth factor 6                                                               | -3.080                       |

| <b>Gene Symbol</b> | <b>Gene Name</b>                                  | <b>Expression Difference</b> |
|--------------------|---------------------------------------------------|------------------------------|
| MEOX2              | mesenchyme homeobox 2                             | -3.066                       |
| MEIS1              | Meis homeobox 1                                   | -3.054                       |
| BMPER              | BMP binding endothelial regulator                 | -3.037                       |
| NPPB               | natriuretic peptide B                             | -3.034                       |
| STAB2              | stabilin 2                                        | -3.005                       |
| SCG2               | secretogranin II                                  | -2.989                       |
| S100A7             | S100 calcium binding protein A7                   | -2.946                       |
| SFRP2              | secreted frizzled-related protein 2               | -2.941                       |
| SHH                | sonic hedgehog                                    | -2.901                       |
| PDCD10             | programmed cell death 10                          | -2.879                       |
| VHL                | von Hippel-Lindau tumor suppressor                | -2.866                       |
| NOX1               | NADPH oxidase 1                                   | -2.827                       |
| PF4                | platelet factor 4                                 | -2.773                       |
| C6                 | complement component 6                            | -2.735                       |
| APOH               | apolipoprotein H (beta-2-glycoprotein I)          | -2.717                       |
| IL8                | interleukin 8                                     | -2.609                       |
| IL18               | interleukin 18 (interferon-gamma-inducing factor) | -2.533                       |

## Supplemental Figure/Table Legends

**Supplemental Figure 1. (A) Sequence alignment between HRMs and 3'UTR of Ago1. (B) Cross-species alignment of HRM target sequences in Ago1 3'UTR.** Alignment of Ago1 3'UTR from various species using UCSC genome browser. Target sites are in the colored region (seed sequences in red). Asterisks (\*) indicate conserved sites cross-species.

**Supplemental Figure 2. Effects of pre-miRs and LNAs in miRNA level.** HUVECs were transfected with pre-miRs (A) or LNAs (B) as indicated. miRNA level in ECs transfected with control RNAs was set as 1. Data represent mean  $\pm$  SD from 3 independent experiments. \*  $p < 0.05$  compared to control RNA group.

**Supplemental Figure 3. Examples of amplification charts from miRISC-associated miRNA qPCR.** Ago1 was immunoprecipitated from normoxic or hypoxic HUVECs and the associated miRNAs were detected by qPCR. Signals of normoxia (Nx) or hypoxia (Hx) were plotted in the amplification chart. IgG was used as an isotype control.

**Supplemental Figure 4. HRMs are associated with Ago2 in hypoxic ECs.** (A) HUVECs were transfected with control RNA or Ago2 siRNA and kept under normoxia for 72 hr. Respective proteins were detected by Western Blotting. (B,C) Ago2 was immunoprecipitated from normoxic or hypoxic HUVECs. qPCR analysis of associated miRNA (B) and mRNA (C).

**Supplemental Figure 5. (A,B) Effect of 72-hr, 8% O<sub>2</sub> hypoxia on HRMs and Ago1 levels.** C57BL6 mice were subjected to hypoxia (Hx, 8% O<sub>2</sub>) or normoxia (Nx) for 3 days. Let-7s and miR-103/107 were detected by qPCR in multi-organs/tissues (A) and Ago1 by Western blotting analysis (B). Data represent 2 mice per group. **(C,D) Effect of 7-day, 10% O<sub>2</sub> hypoxia on HRMs and Ago2 levels.**

miRNAs (C) and Ago2 (D) were detected in multiple organs from animals subjected to hypoxia (Hx, 10% O<sub>2</sub>) or normoxia (Nx) for 7 days. Data were obtained from 4-6 mice per group. The level of various molecules in normoxia group was set to 1. Open bars: levels under normoxia; filled bars: levels under hypoxia.

**Supplemental Figure 6. Effect of antagomiR in miRNA abundance in Matrigel plugs from hypoxic mice.** Matrigel mixed with control RNA or antagomiRs against Let-7a, Let-7e, and miR-103 were subcutaneously injected into the dorsal surface of C57BL6 mice. After subjection to 10% O<sub>2</sub> for 5 days, Matrigel plugs were harvested, homogenized in Trizol, and RNA was extracted. Levels of specific miRNA were detected by qPCR. Results presented were from 3 animals per group.

**Supplemental Figure 7. Hypoxia alters Ago1-associated miRNAs and mRNAs.** Ago1 was immunoprecipitated from HUVECs subjected to normoxia (open bar) or hypoxia (close bar). Ago1-associated miRNA (A) or mRNAs (B) as indicated were detected by qPCR.

**Supplemental Figure 8. HIF2 $\alpha$  Induction of HRMs.** (A, B) HUVECs were transfected with pCMV parental vector or pCMV-HIF2 $\alpha$  (3  $\mu$ g per 10<sup>6</sup> cells) for 36 hr. mRNA levels were determined by qPCR. The level of HIF2 $\alpha$  was relative to that of  $\beta$ -actin (A), and that of HRMs was relative to U6 (B). Data are mean  $\pm$  SD of 3 independent experiments. (C) Putative HIF2 $\alpha$  binding sites in the respective promoters of HRMs.

**Supplemental Table 1. miRNA profile in normoxia (Nx) and hypoxia (Hx) in HUVECs.** The abundance of miRNAs was demonstrated by their reads in the libraries derived from normoxic or hypoxic cells, and then fold change under hypoxia relative to normoxic controls was determined. miRNAs of reads more than 10 were included.

**Supplemental Table 2. Putative HIF1 $\alpha$  binding sites in the HRM promoter regions.** Putative HIF1 $\alpha$  binding sites in human and mouse genomes were predicted by TransFac and position-weight matrix approach. The conservation score was calculated by PhastCons in the UCSC Genome Browser.

**Supplemental Table 3 Summary of putative HRM targets.** A) The number of potential miRNA targets commonly predicted from 3 algorithms. B) The classification of genes involved in various cellular functions based on gene ontology (GO) terms. C) Examples of putative target genes of Let-7s and miR-103/107. Note that Ago1 is a common target of HRMs.

**Supplemental Table 4. Correlation among HRM, Ago1, VEGF, and CD31 levels in HCC tissue array.** Spearman's non-parametric correlation test was used to assess the correlation between various molecules. The negative values of Spearman's rho in conjunction with  $p$  values  $<0.05$  indicate significant inverse correlations.

**Supplemental Table 5, 6. Genes involved in glycolysis (Table 5) and angiogenesis (Table 6) that are decreased in Ago1-miRISC under hypoxia.** Ago1 was immunoprecipitated from a pool of 8 batches of normoxic or hypoxic HUVEC lysates. mRNA transcripts associated in the immunoprecipitates were measured by using Affymetrix human Gene 1.0 ST array. The difference of Ago1-associated mRNA in hypoxia relative to normoxia was presented as log<sub>2</sub> of the fold change. The cut-off was set to be -2.5. Genes were categorized in Tables 5 and 6 by their GO terms.

## Supplemental Materials and Methods

### Oligo Sequences for Construction of Small RNA Libraries

5' tags:

Normoxia: 5'-GUUCAGAGUUCUACAGUCCGACGAUCCG-3'

Hypoxia: 5'-GUUCAGAGUUCUACAGUCCGACGAUCCU-3'

3' adaptor: 5'-pUCGUAUGCCGUCUUCUGCUUGidT-3'

### Northern Blotting, Taqman miRNA Quantitative PCR (qPCR), and RT-qPCR

Total RNA was fractionated and transferred to nylon membranes, UV-crosslinked, and hybridized with <sup>32</sup>P-labeled oligos complementary to mature miRNAs. The results were visualized by exposure to x-ray films. Taqman miRNA qPCR followed the manufacturer's protocols (Applied Biosystems). To quantitate mRNAs, total RNAs underwent RT and real-time qPCR with iQ SYBR Green (Bio-Rad). Fold changes were calculated by the  $\Delta\Delta C_t$  method. The sequences of primer sets used in mRNA qPCRs are listed below:

Human Ago1 forward: 5'-ATTGTGAGCTGGCGAATGCT-3'

Human Ago1 reverse: 5'-CAGGCGGTGAGAAGAAGGAG-3'

Human Ago2 forward: 5'-CTTCAAGCCTCCACCTAGACC-3'

Human Ago2 reverse: 5'-CATGTGTTCCACGATTTCCCT-3'

Human Ago3 forward: 5'-CCTTCTACAAAGCACAACCTGT-3'

Human Ago3 reverse: 5'-CCACAATGAGTCACTTCAACC-3'

Human VEGF-A forward: 5'-CGCAGCTACTGCCATCCAAT-3'

Human VEGF-A reverse: 5'-GTGAGGTTTGATCCGCATAAT-3'

Human PDGF-B forward: 5'-GATCCGCTCCTTTGATGATC-3'

Human PDGF-B reverse: 5'-GTCTCACACTTGCATGCCAG-3'

Human PIGF forward: 5'-CAGAGGTGGAAGTGGTACCCTTCC-3'

Human PIGF reverse: 5'-CGGATCTTTAGGAGCTGCATGGTGAC-3'

Human HIF2 $\alpha$  forward: 5'-CGGAGGTGTTCTATGAGCTGG-3'

Human HIF2 $\alpha$  reverse: 5'-AGCTTGTGTGTTTCGCAGGAA-3'

Human  $\beta$ -actin forward: 5'-GCACCACACCTTCTACAATG-3'

Human  $\beta$ -actin reverse: 5'-ATCACGATGCCAGTGGTAC-3'

### **Cell Culture, Adenovirus Infection, and Transient Transfection**

HUVECs, HEK-293, and bovine aortic endothelial cells (BAECs) were cultured by standard protocols. The normoxic cells were kept at 37°C ventilated with 5% CO<sub>2</sub> and atmospheric 21% oxygen. The hypoxic cells were maintained in an incubator infused with 2% oxygen, 5% CO<sub>2</sub>, and 93% nitrogen. HIF1 $\alpha$  was overexpressed in HUVECs with use of an adenoviral vector (Ad-HIF1 $\alpha$ , Cell Biolab). Pre-miR, anti-miRs (Ambion), LNAs (Exiqon), Ago1 or Ago2 siRNA (Qiagen), or DNA plasmids (for BAECs) were transfected into cells with use of Lipofectamine 2000 (Invitrogen).

To overexpress HA, HA-Ago1, or HA-HIF2 $\alpha$  in HUVECs, cells were transfected with Cytfect-HUVEC Transfection Kit (Cell Applications), following manufacturer's protocol. Specifically, cells were cultured to 70-80% confluency in a 6-well plate. Per well, 3  $\mu$ g of DNA plasmid were mixed with 2.5  $\mu$ l of CF2 and 2.5  $\mu$ l of PE reagents and incubated at 37°C for 25 min. The mixture was then added to HUVECs and kept for 1 hr, before replacement with fresh EC culture medium. The transfection was allowed for 18 to 24 hr before the cells were subjected to subsequent experiments.

### ***In vitro* EC Tube Formation Assay**



HUVECs were seeded at 30,000 cells/well in 24-well plates pre-coated with Matrigel (BD Biosciences) and subjected to normoxia or hypoxia for 16 hr. The images were captured using a digital camera connected to a stereoscope.

### **AntagomiRs Used in Animal Study**

Single-stranded RNA with chemical modifications were synthesized and HPLC-purified by Dharmacon, Inc. The sequences and modifications of antagomiRs used in this study are as follows:

AntagomiR-let-7a:

5'mA(\*)mC(\*)mUmCmCmAmUmCmAmUmCmCmAmAmCmAmUmAmU(\*)mC(\*)mA(\*)mA(\*) 3' Chl

AntagomiR-let-7e:

5'mA(\*)mC(\*)mUmCmCmAmUmCmCmUmCmCmAmAmCmAmUmAmU(\*)mC(\*)mA(\*)mA(\*)3' Chl

AntagomiR-103:

5'mU(\*)mC(\*)mGmUmCmGmUmAmACmAmUmGmUmCmCmCmGmAmU(\*)mA(\*)mC(\*)mU(\*) 3' Chl

Control antagomiR:

5'mA(\*)mA(\*)mGmGmCmAmAmGmCmUmGmAmCmCmCmUmGmAmA(\*)mG(\*)mU(\*)mU(\*)3' Chl

The lower case “m” represents 2'-OMe-modified nucleotides; “(\*)” represents a phosphorothioate linkage; “Chl” represents cholesterol linked through a hydroxyprolinol linkage.

### **Hematoxylin and Eosin Staining (HE staining)**

HE staining of matrigel plugs involved use of an autostainer (Leica Autostainer CV5030). Paraffin sections of each sample were heated to 60°C and treated with xylene to remove paraffin, followed by rehydration of ethanol solutions from 99.99% to 75%. After hematoxylin treatment, each sample was immersed in NH<sub>3(aq)</sub> for 20 sec followed by eosin staining. Specimens were then gradually dehydrated with increasing ethanol gradient and subsequent xylene treatment. All specimens were then sealed for further morphology examinations.

### **Immunohistochemical Staining of Matrigel Plugs**

Paraffin-embedded matrigel sections were deparaffinized as described above before antigen retrieval with target retrieval solution (pH 6.1) (DAKO) at 121°C for 10 min. Samples were then blocked with 3% H<sub>2</sub>O<sub>2</sub> to eliminate endogeneous peroxidase activities, then 3% normal goat serum in PBS to reduce endogeneous biotin activities. For IHC staining, samples were incubated with rabbit anti-vWF antibody (Sigma-Aldrich, HPA001815, dilution 1:250) or CD31 antibody (Santa Cruz, SC01506, dilution 1:100) overnight at 4°C, then after three washes with PBS, anti-rabbit IgG secondary antibody (dilution 1:200), then avidin biotin complex (Vector Laboratories Inc.). A DAB peroxidase substrate kit (Vector Laboratories Inc., SK-4100) was used to visualize the staining. Samples underwent counterstaining by use of an autostainer (Leica Autostainer CV5030). All samples were viewed and photographed under an Olympus microscope.
